# Supplementary material
Source: Springer Nature journal article supplement (https://www.springermedizin.de/resource/supplementary/12880_2013_199_MOESM6_ESM.pdf/9450210)

(a)

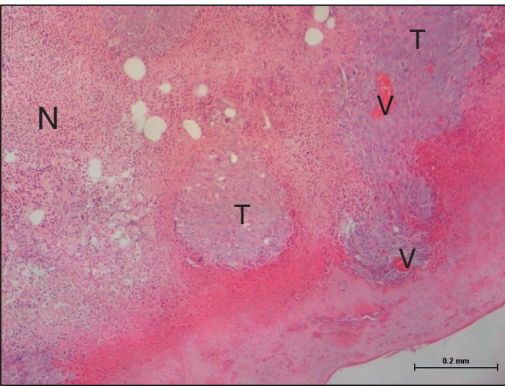

(b)

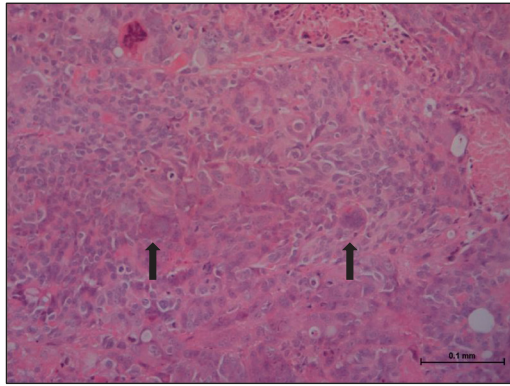

(c)

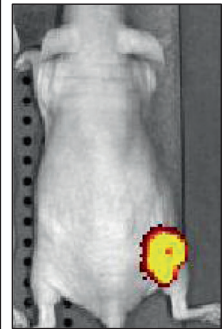

Supplement: MOESM6 [file 9450210]
